# Supplementary material for: The PENGUIN approach to reconstruct protein interactions at enhancer-promoter regions and its application to prostate cancer
Source: PubMed Central journal article supplement (PMC10700545; doi:10.1038/s41467-023-43767-1), 2023-12-06
Supplement: 41467_2023_43767_MOESM3_ESM.pdf [file 41467_2023_43767_MOESM3_ESM.pdf]

**Description of additional supplementary files**

**File name:** Supplementary Data 1-12

**Description:** Additional analyses and source data.
