# Supplementary material for: The PENGUIN approach to reconstruct protein interactions at enhancer-promoter regions and its application to prostate cancer
Source: PubMed Central journal article supplement (PMC10700545; doi:10.1038/s41467-023-43767-1), 2023-12-06
Supplement: 41467_2023_43767_MOESM5_ESM.pdf [file 41467_2023_43767_MOESM5_ESM.pdf]

## Reporting Summary

Nature Portfolio wishes to improve the reproducibility of the work that we publish. This form provides structure for consistency and transparency in reporting. For further information on Nature Portfolio policies, see our [Editorial Policies](#) and the [Editorial Policy Checklist](#).

### Statistics

For all statistical analyses, confirm that the following items are present in the figure legend, table legend, main text, or Methods section.

| n/a                                 | Confirmed                                                                                                                                                                                                                                                                                      |
|-------------------------------------|------------------------------------------------------------------------------------------------------------------------------------------------------------------------------------------------------------------------------------------------------------------------------------------------|
| <input type="checkbox"/>            | <input checked="" type="checkbox"/> The exact sample size ( $n$ ) for each experimental group/condition, given as a discrete number and unit of measurement                                                                                                                                    |
| <input type="checkbox"/>            | <input checked="" type="checkbox"/> A statement on whether measurements were taken from distinct samples or whether the same sample was measured repeatedly                                                                                                                                    |
| <input type="checkbox"/>            | <input checked="" type="checkbox"/> The statistical test(s) used AND whether they are one- or two-sided<br><i>Only common tests should be described solely by name; describe more complex techniques in the Methods section.</i>                                                               |
| <input type="checkbox"/>            | <input checked="" type="checkbox"/> A description of all covariates tested                                                                                                                                                                                                                     |
| <input type="checkbox"/>            | <input checked="" type="checkbox"/> A description of any assumptions or corrections, such as tests of normality and adjustment for multiple comparisons                                                                                                                                        |
| <input type="checkbox"/>            | <input checked="" type="checkbox"/> A full description of the statistical parameters including central tendency (e.g. means) or other basic estimates (e.g. regression coefficient) AND variation (e.g. standard deviation) or associated estimates of uncertainty (e.g. confidence intervals) |
| <input type="checkbox"/>            | <input checked="" type="checkbox"/> For null hypothesis testing, the test statistic (e.g. $F$ , $t$ , $r$ ) with confidence intervals, effect sizes, degrees of freedom and $P$ value noted<br><i>Give <math>P</math> values as exact values whenever suitable.</i>                            |
| <input checked="" type="checkbox"/> | <input type="checkbox"/> For Bayesian analysis, information on the choice of priors and Markov chain Monte Carlo settings                                                                                                                                                                      |
| <input type="checkbox"/>            | <input checked="" type="checkbox"/> For hierarchical and complex designs, identification of the appropriate level for tests and full reporting of outcomes                                                                                                                                     |
| <input checked="" type="checkbox"/> | <input type="checkbox"/> Estimates of effect sizes (e.g. Cohen's $d$ , Pearson's $r$ ), indicating how they were calculated                                                                                                                                                                    |

*Our web collection on [statistics for biologists](#) contains articles on many of the points above.*

### Software and code

Policy information about [availability of computer code](#)

|                 |                                                                                                                                                                                                                                                                                                                                                                                                                                                                                                                                                                                                                                                                                                                                                                                                                                                                                                                                                                                                                                                                                                                                                          |
|-----------------|----------------------------------------------------------------------------------------------------------------------------------------------------------------------------------------------------------------------------------------------------------------------------------------------------------------------------------------------------------------------------------------------------------------------------------------------------------------------------------------------------------------------------------------------------------------------------------------------------------------------------------------------------------------------------------------------------------------------------------------------------------------------------------------------------------------------------------------------------------------------------------------------------------------------------------------------------------------------------------------------------------------------------------------------------------------------------------------------------------------------------------------------------------|
| Data collection | The data collected in this study was obtained from previous publications (Giambartolomei et al. 2021) and dedicated databases (e.g., binding motifs from JASPAR (Fornes et al. 2019)). HiChIP data was generated following the procedure described in Mumbach et al. 2016.                                                                                                                                                                                                                                                                                                                                                                                                                                                                                                                                                                                                                                                                                                                                                                                                                                                                               |
| Data analysis   | HiC-Pro (Servant et al. 2015) was used to map the HiChIP trimmed reads and extract unique interactions, then refined with FitHiChIP (Bhattacharyya et al. 2019). TADbit (Serra et al. 2017) was used for normalization comparison. FIMO (Grant et al. 2011) was used to identify DNA binding motifs. VIPER pipeline (Cornwell et al. 2018) was used for RNASeq analysis. g:Profiler (Raudvere et al. 2019) was used for biomedical annotations enrichment analysis. All other computational analyses were performed using standard, open-source Python and R libraries.<br><br>Source code of the related to the PENGUIN protocol is available at github: <a href="https://github.com/bsc-life/penguin_software">https://github.com/bsc-life/penguin_software</a> <a href="https://doi.org/10.5281/zenodo.10036678">https://doi.org/10.5281/zenodo.10036678</a><br>Source code of the related to the PENGUIN web service is available at github: <a href="https://github.com/bsc-life/penguin_analytics">https://github.com/bsc-life/penguin_analytics</a> <a href="https://doi.org/10.5281/zenodo.10036730">https://doi.org/10.5281/zenodo.10036730</a> |

For manuscripts utilizing custom algorithms or software that are central to the research but not yet described in published literature, software must be made available to editors and reviewers. We strongly encourage code deposition in a community repository (e.g. GitHub). See the Nature Portfolio [guidelines for submitting code & software](#) for further information.

## Data

Policy information about [availability of data](#)

All manuscripts must include a [data availability statement](#). This statement should provide the following information, where applicable:

- Accession codes, unique identifiers, or web links for publicly available datasets
- A description of any restrictions on data availability
- For clinical datasets or third party data, please ensure that the statement adheres to our [policy](#)

RefSeq hg19 from UCSC Genome Browser is available at the following URL:

<http://genome.ucsc.edu/cgi-bin/hgTables?>

[hgtsid=694977049\\_xUU5i1QkIJ50dj5miBt9wkAYuxN3&clade=mammal&org=&db=hg19&hgta\\_group=genes&hgta\\_track=knownGene&hgta\\_table=knownGene&hgta\\_regionType=genome&position=&hgta\\_outputType=selectedFields&hgta\\_outFileName=knownGene.gtf](http://genome.ucsc.edu/cgi-bin/hgTables?hgtsid=694977049_xUU5i1QkIJ50dj5miBt9wkAYuxN3&clade=mammal&org=&db=hg19&hgta_group=genes&hgta_track=knownGene&hgta_table=knownGene&hgta_regionType=genome&position=&hgta_outputType=selectedFields&hgta_outFileName=knownGene.gtf)

All EPINs and related statistics can be downloaded through the PENGUIN web service at <https://penguin.life.bsc.es/>

All the raw listed in Table 3, as well as the corresponding processed and metadata for LHSAR and LNCaP related to H3K27ac (HiChIP) and RNAseq have been deposited in GEO (number GSE235245 [<https://www.ncbi.nlm.nih.gov/geo/query/acc.cgi?acc=GSE235245>]). The data can also be downloaded from our github repository ([https://github.com/bsc-life/penguin\\_software/tree/main/data](https://github.com/bsc-life/penguin_software/tree/main/data)). CTCF ChIP-Seq data used in this work comes from ENCODE61 with references GSM2827202 [<https://www.ncbi.nlm.nih.gov/geo/query/acc.cgi?acc=GSM2827202>], GSM2827203 [<https://www.ncbi.nlm.nih.gov/geo/query/acc.cgi?acc=GSM2827203>] for LNCaP and GSM2825573 [<https://www.ncbi.nlm.nih.gov/geo/query/acc.cgi?acc=GSM2825573>], GSM2825574 [<https://www.ncbi.nlm.nih.gov/geo/query/acc.cgi?acc=GSM2825574>] for the human epithelial cells or prostate that we use to infer CTCF-bindings in LHSAR GSM2825573 [<https://www.ncbi.nlm.nih.gov/geo/query/acc.cgi?acc=GSM2825573>], GSM2825574 [<https://www.ncbi.nlm.nih.gov/geo/query/acc.cgi?acc=GSM2825574>]. All the datasets used in this manuscript are: HiChIP H3K27ac (5 replicates for LNCaP and 3 replicates for LHSAR), RNA-seq (2 replicates for LNCaP and 2 replicates for LHSAR), ChIP-seq H3K27ac (1 replicate for LNCaP and 2 replicates for LHSAR), ChIP-seq CTCF (2 replicates for LNCaP and 2 replicates for LHSAR). CRISPR/Cas9 knockout and RNAi screens conducted in prostate cancer LNCaP cells were downloaded from the DepMap database (<https://depmap.org/>, DepMap ID: ACH-000977).

## Research involving human participants, their data, or biological material

Policy information about studies with [human participants or human data](#). See also policy information about [sex, gender \(identity/presentation\), and sexual orientation](#) and [race, ethnicity and racism](#).

Reporting on sex and gender

Sex and gender are not considered in this study as it focuses on prostate cancer and uses immortalized cell lines.

Reporting on race, ethnicity, or other socially relevant groupings

Does not apply.

Population characteristics

Does not apply.

Recruitment

Does not apply.

Ethics oversight

Does not apply.

Note that full information on the approval of the study protocol must also be provided in the manuscript.

## Field-specific reporting

Please select the one below that is the best fit for your research. If you are not sure, read the appropriate sections before making your selection.

Life sciences

Behavioural & social sciences

Ecological, evolutionary & environmental sciences

For a reference copy of the document with all sections, see [nature.com/documents/nr-reporting-summary-flat.pdf](https://www.nature.com/documents/nr-reporting-summary-flat.pdf)

## Life sciences study design

All studies must disclose on these points even when the disclosure is negative.

Sample size

H3K27ac HiChIP / ChIP was performed as previously described (<https://pubmed.ncbi.nlm.nih.gov/29909987/>). 10 million cells were used as this is the standard for these experiments (<https://pubmed.ncbi.nlm.nih.gov/34822763/>).

Data exclusions

No HiChIP data was excluded, except non-significant hits as described <https://pubmed.ncbi.nlm.nih.gov/34822763/>

Replication

Data consists of H3K27Ac HiChIP on LNCaP across 5 biological replicates (<https://pubmed.ncbi.nlm.nih.gov/34822763/>) and H3K27Ac HiChIP on LHSAR across 3 replicates, thus surpassing the typical minimum accepted number of replicates of two. LHSAR is a control and 3 replicates are OK (i.e. we are not calling the target genes). All replications were successful.

Randomization

Blinding

## Reporting for specific materials, systems and methods

We require information from authors about some types of materials, experimental systems and methods used in many studies. Here, indicate whether each material, system or method listed is relevant to your study. If you are not sure if a list item applies to your research, read the appropriate section before selecting a response.

### Materials & experimental systems

- | n/a                                 | Included in the study                                     |
|-------------------------------------|-----------------------------------------------------------|
| <input type="checkbox"/>            | <input checked="" type="checkbox"/> Antibodies            |
| <input type="checkbox"/>            | <input checked="" type="checkbox"/> Eukaryotic cell lines |
| <input checked="" type="checkbox"/> | <input type="checkbox"/> Palaeontology and archaeology    |
| <input checked="" type="checkbox"/> | <input type="checkbox"/> Animals and other organisms      |
| <input checked="" type="checkbox"/> | <input type="checkbox"/> Clinical data                    |
| <input checked="" type="checkbox"/> | <input type="checkbox"/> Dual use research of concern     |
| <input checked="" type="checkbox"/> | <input type="checkbox"/> Plants                           |

### Methods

- | n/a                                 | Included in the study                           |
|-------------------------------------|-------------------------------------------------|
| <input type="checkbox"/>            | <input checked="" type="checkbox"/> ChIP-seq    |
| <input checked="" type="checkbox"/> | <input type="checkbox"/> Flow cytometry         |
| <input checked="" type="checkbox"/> | <input type="checkbox"/> MRI-based neuroimaging |

### Antibodies

Antibodies used

Validation

### Eukaryotic cell lines

Policy information about [cell lines and Sex and Gender in Research](#)

Cell line source(s)

Authentication

Mycoplasma contamination

Commonly misidentified lines (See [ICLAC](#) register)

### Plants

Seed stocks

Novel plant genotypes

Authentication

### ChIP-seq

#### Data deposition

Confirm that both raw and final processed data have been deposited in a public database such as [GEO](#).

Confirm that you have deposited or provided access to graph files (e.g. BED files) for the called peaks.

Data access links

Files in database submission

Genome browser session (e.g. [UCSC](#))

<http://genome.ucsc.edu/cgi-bin/hgTables?>

[hgsid=694977049\\_xUU5i1QkIJ50dj5miBt9wkAYuxN3&clade=mammal&org=&db=hg19&hgta\\_group=genes&hgta\\_track=knownGene&hgta\\_table=knownGene&hgta\\_regionType=genome&position=&hgta\\_outputType=selectedFields&hgta\\_outFileName=knownGene.gtf](http://genome.ucsc.edu/cgi-bin/hgTables?hgsid=694977049_xUU5i1QkIJ50dj5miBt9wkAYuxN3&clade=mammal&org=&db=hg19&hgta_group=genes&hgta_track=knownGene&hgta_table=knownGene&hgta_regionType=genome&position=&hgta_outputType=selectedFields&hgta_outFileName=knownGene.gtf)

## Methodology

|                         |                                                                                                                                                                                                                                                                                                                            |
|-------------------------|----------------------------------------------------------------------------------------------------------------------------------------------------------------------------------------------------------------------------------------------------------------------------------------------------------------------------|
| Replicates              | H3K27Ac HiChIP on LNCaP was performed across 5 biological replicates as previously described ( <a href="https://pubmed.ncbi.nlm.nih.gov/34822763/">https://pubmed.ncbi.nlm.nih.gov/34822763/</a> ) H3K27Ac HiChIP on LHSAR was performed across 3 biological replicates.                                                   |
| Sequencing depth        | H3K27Ac HiChIP on LNCaP includes 1 billion reads as previously described ( <a href="https://pubmed.ncbi.nlm.nih.gov/34822763/">https://pubmed.ncbi.nlm.nih.gov/34822763/</a> ); H3K27Ac HiChIP on LHSAR includes 309 million reads.                                                                                        |
| Antibodies              | We used antibodies targeting H3K27Ac as previously described ( <a href="https://pubmed.ncbi.nlm.nih.gov/34822763/">https://pubmed.ncbi.nlm.nih.gov/34822763/</a> )                                                                                                                                                         |
| Peak calling parameters | The alignment, processing and loop calling from raw fastq files (paired-end data) was performed as previously described ( <a href="https://pubmed.ncbi.nlm.nih.gov/34822763/">https://pubmed.ncbi.nlm.nih.gov/34822763/</a> )                                                                                              |
| Data quality            | We identified 49,565 significant interactions (FitHiChIP, FDR<0.01) for LNCaP, and 12,053 for LHSAR.                                                                                                                                                                                                                       |
| Software                | HiC-Pro ( <a href="https://pubmed.ncbi.nlm.nih.gov/26619908/">https://pubmed.ncbi.nlm.nih.gov/26619908/</a> ) was used to map the HiChIP trimmed reads and extract unique interactions, then refined with FitHiChIP ( <a href="https://pubmed.ncbi.nlm.nih.gov/31530818/">https://pubmed.ncbi.nlm.nih.gov/31530818/</a> ). |
